# Supplementary material
Source: publisher site journal article supplement (https://www.dovepress.com/article/288011)
Supplement: Supplementary file 1 [file get_supplementary_file.php]

**
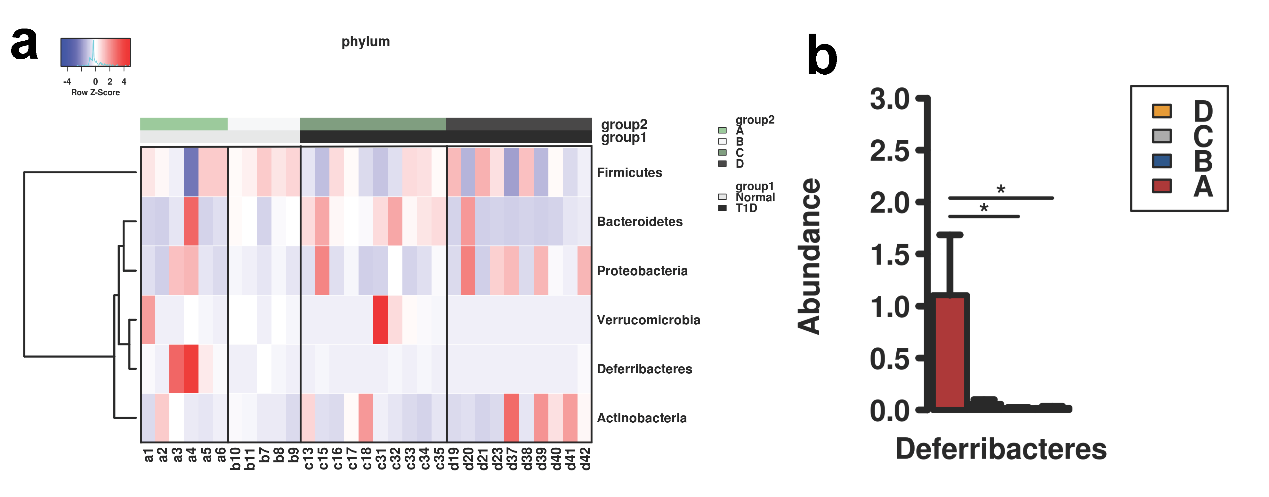
**

**Supplemental Figure S1.** Comparative analysis of gut microbiota at the Phylum level in the mice from all groups. (a) Heatmap of gut microbiota at the Phylum level in the normal or T1DM mice treated with vehicle or CA. (b) Comparative analysis of Deferribacteres abundance in the normal or T1DM mice treated with vehicle or CA. A = control + vehicle group; B = control + CA group; C = T1DM + vehicle group; D = T1MD + CA group.***P<0.05.


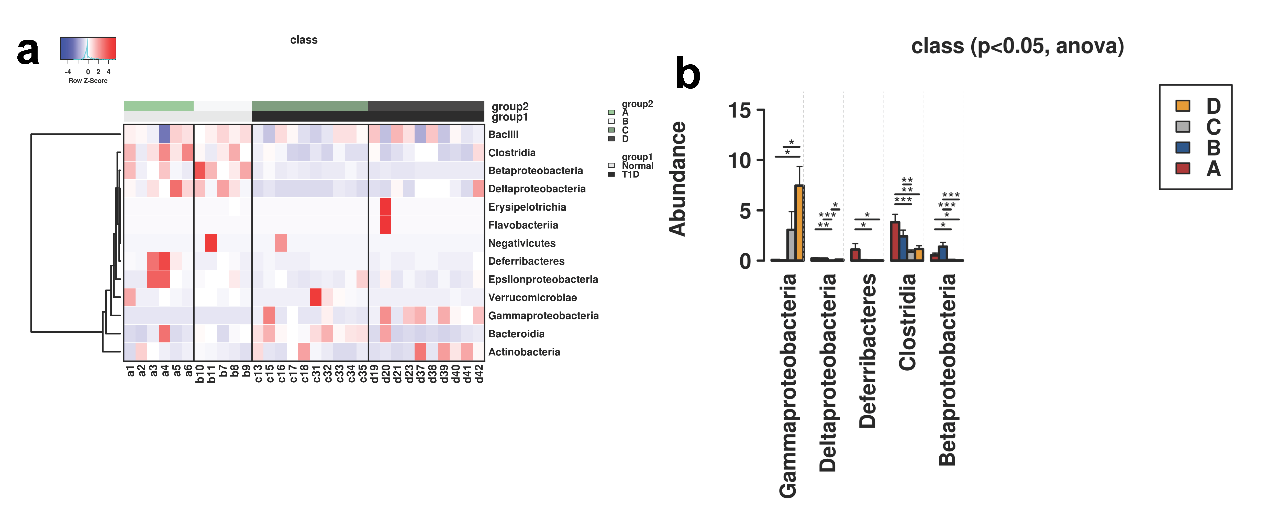


**Supplemental Figure S2.** Comparative analysis of gut microbiota at the class level in the mice from all groups. (a) Heatmap of gut microbiota at the class level in the normal or T1DM mice treated with vehicle or CA. (b) Comparative analysis of Gammaproteobacteria, Deltaproteobacteria, Deferribacteres, Clostridia, Betaproteobacteria abundance in the normal or T1DM mice treated with vehicle or CA. A = control + vehicle group; B = control + CA group; C = T1DM + vehicle group; D = T1MD + CA group. ***P<0.05, ****P<0.01 and *****P<0.001.


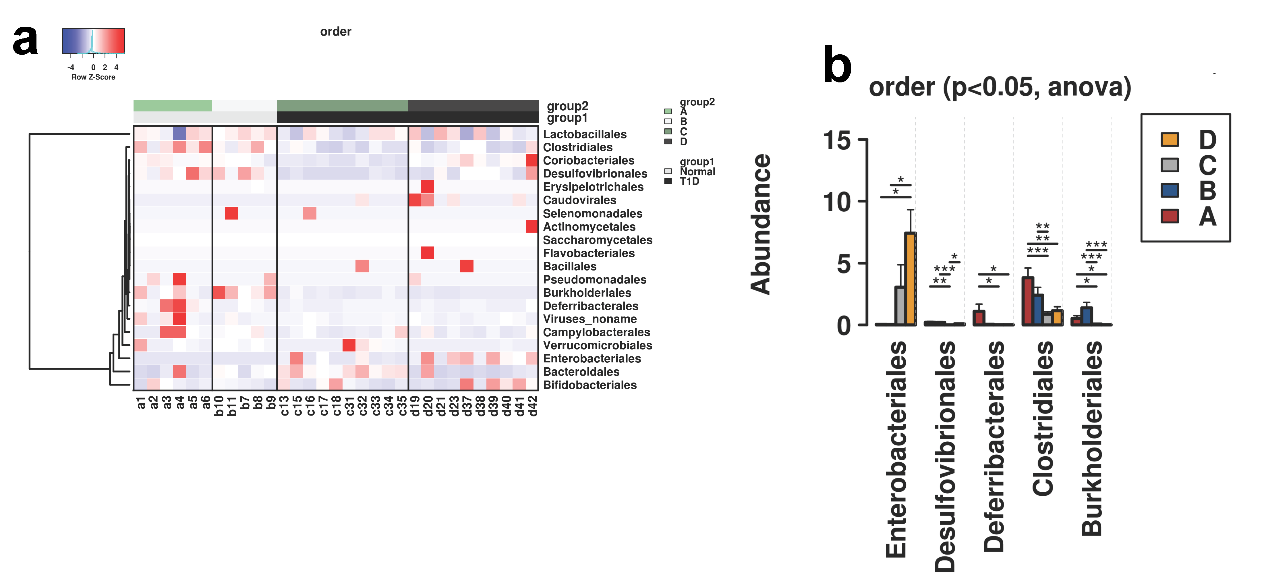


**Supplemental Figure S3.** Comparative analysis of gut microbiota at the order level in the mice from all groups. (a) Heatmap of gut microbiota at the order level in the normal or T1DM mice treated with vehicle or CA. (b) Comparative analysis of gut microbiota abundance at the order level in the normal or T1DM mice treated with vehicle or CA. A = control + vehicle group; B = control + CA group; C = T1DM + vehicle group; D = T1MD + CA group.***P<0.05, ****P<0.01 and *****P<0.001.


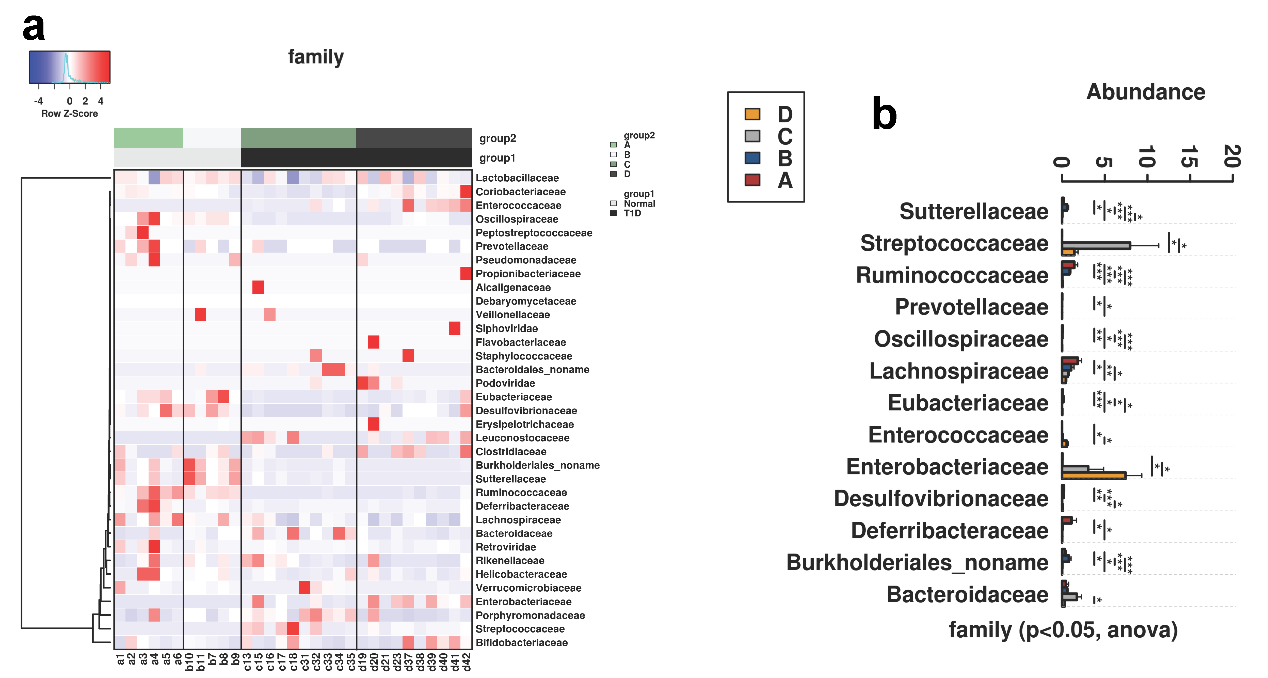


**Supplemental Figure S4.** Comparative analysis of gut microbiota at the family level in the mice from all groups. (a) Heatmap of gut microbiota at the family level in the normal or T1DM mice treated with vehicle or CA. (b) Comparative analysis of gut microbiota abundance at the family level in the normal or T1DM mice treated with vehicle or CA. A = control + vehicle group; B = control + CA group; C = T1DM + vehicle group; D = T1MD + CA group. ***P<0.05, ****P<0.01 and *****P<0.001.


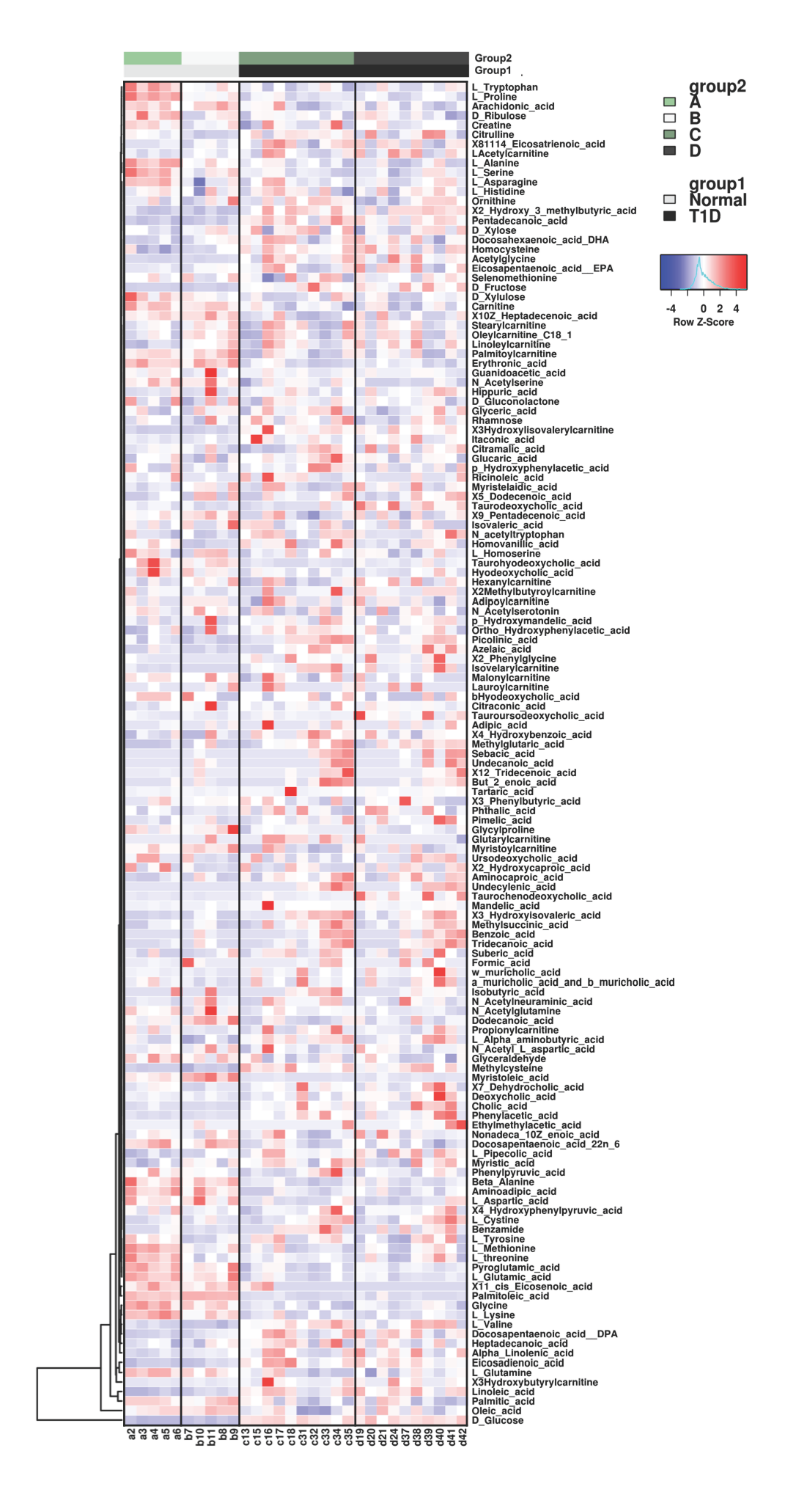


**Supplemental Figure S5.** Heatmap clustering of the serum metabolomics in the mice subjected to vehicle or CA treatment. A = control + vehicle group; B = control + CA group; C = T1DM + vehicle group; D = T1MD + CA group.
